# Supplementary material for: Induction of a 5-lipoxygenase product by daidzein is involved in the regulation of influenza virus replication
Source: PubMed Central journal article supplement (PMC6983437; doi:10.3164/jcbn.19-70), 2020-01-01
Supplement: jcbn19-70sf01.pdf [file jcbn19-70sf01.pdf]

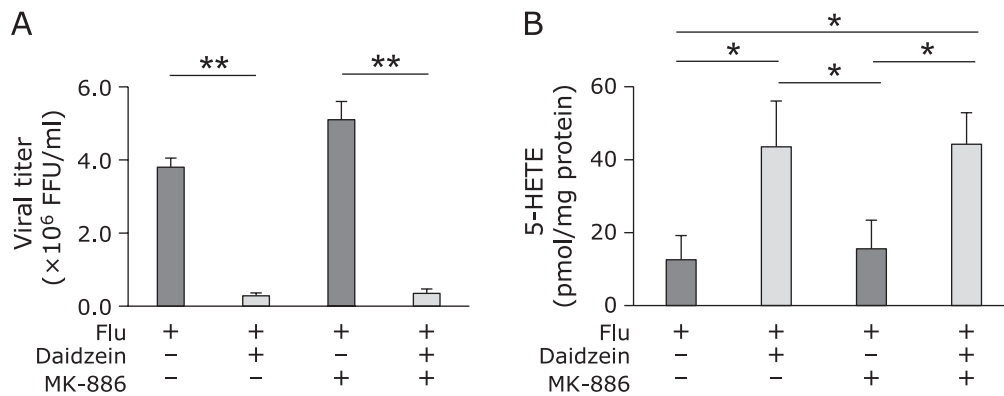

**Supplemental Fig. 1.** Effect of FLAP inhibitor, MK-886, on multiplication of influenza virus and production of 5-HETE. MDCK cells were inoculated with influenza A/PR/8/34 virus at a MOI of 0.001. (A) Effect of MK-886 on titer of influenza virus. Viral titers were determined at 24 h post-infection by focus-forming assays. (B) Effect of MK-886 on 5-HETE production. Data are presented as mean  $\pm$  SD ( $n = 3$ ). Data are representative of three independent experiments. \* $p < 0.005$ , \*\* $p < 0.001$ .
